# Supplementary material for: Anticoagulation in the cirrhotic patient
Source: PubMed Central journal article supplement — JHEP Rep. 2019 Jul 16;1(3):227–39. doi: 10.1016/j.jhepr.2019.02.006 (PMC7001584; doi:10.1016/j.jhepr.2019.02.006), 2019-07-16
Supplement: mmc1.pdf [file mmc1.pdf]

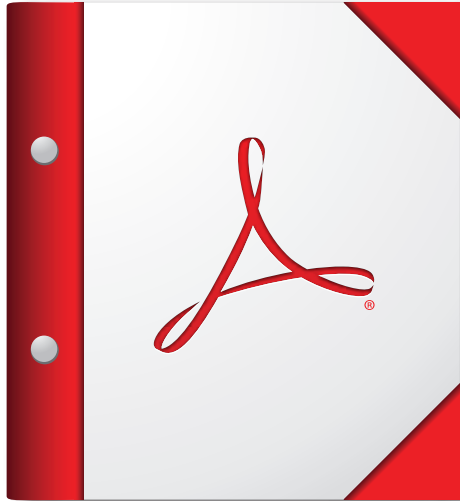

**For the best experience, open this PDF portfolio in  
Acrobat X or Adobe Reader X, or later.**

[Get Adobe Reader Now!](#)
